# Supplementary material
Source: PubMed Central journal article supplement (PMC6939194)

**Figure 1G**

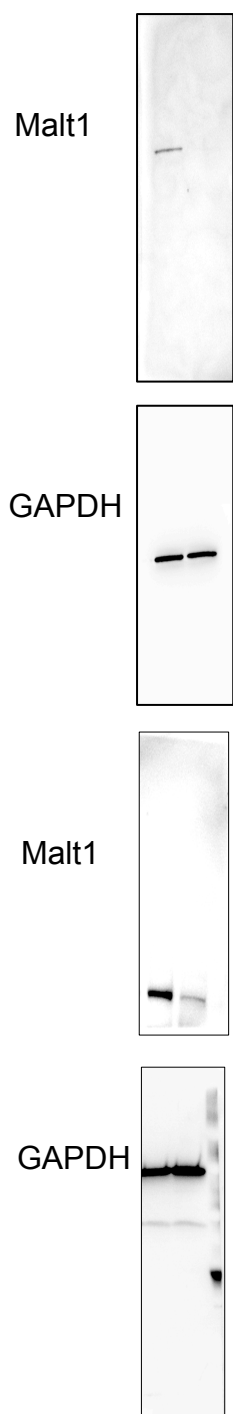

**Figure 1L**

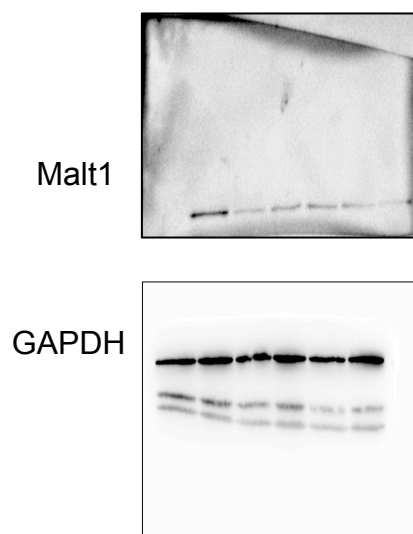

Supplement: EMBJ-39-e102030-s003.pdf [file EMBJ-39-e102030-s003.pdf]

**Figure 2D**

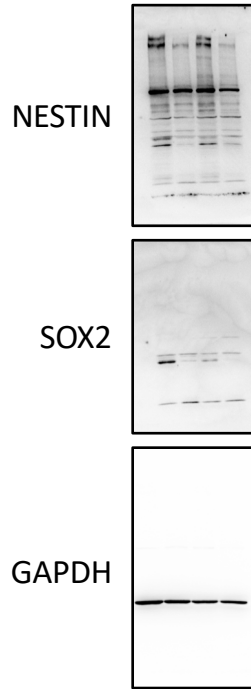

Supplement: EMBJ-39-e102030-s004.pdf [file EMBJ-39-e102030-s004.pdf]

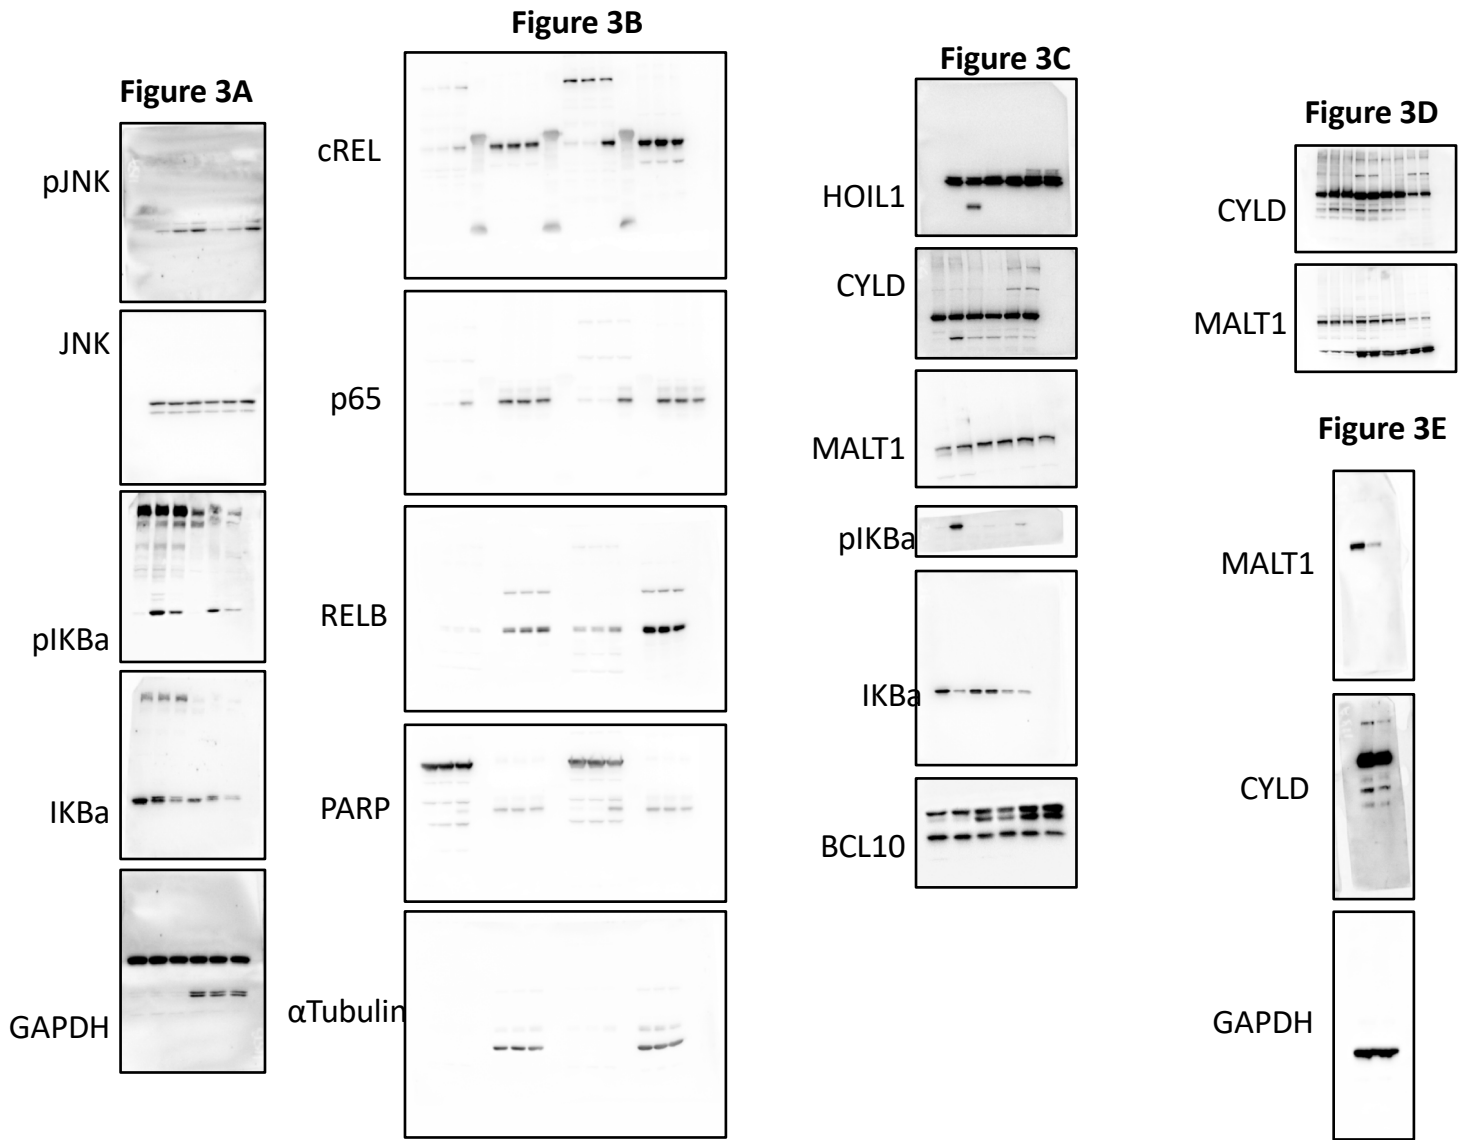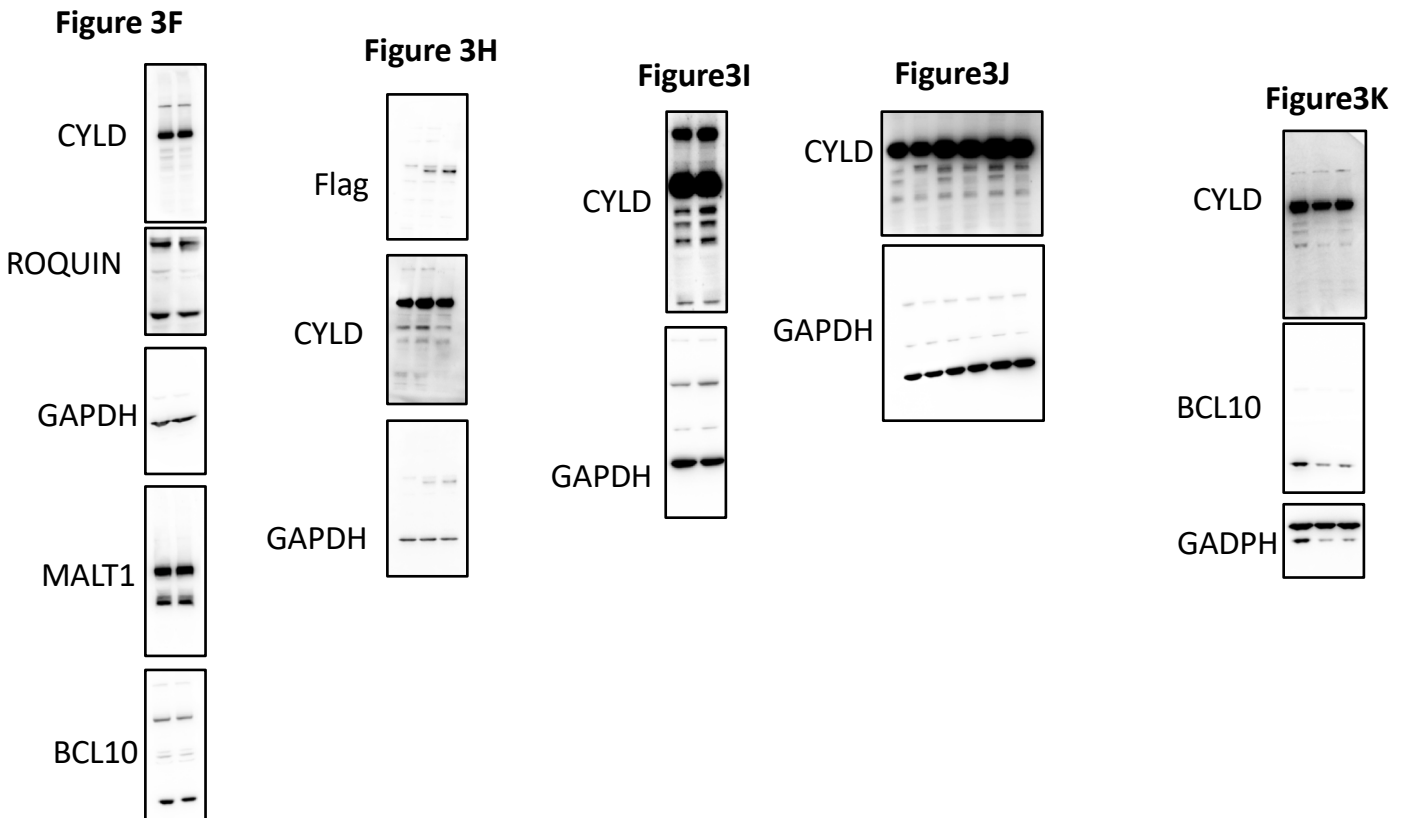

Supplement: EMBJ-39-e102030-s005.pdf [file EMBJ-39-e102030-s005.pdf]

**Figure 4C**

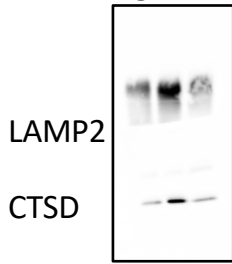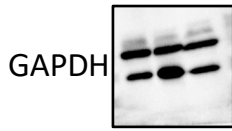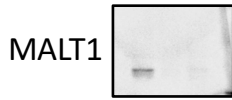

**Figure 4C**

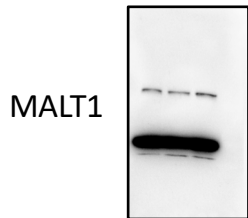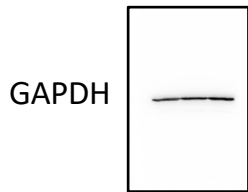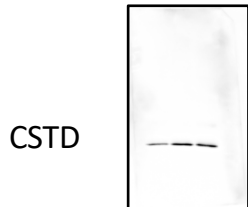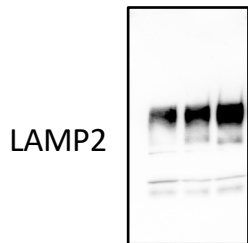

**Figure 4F**

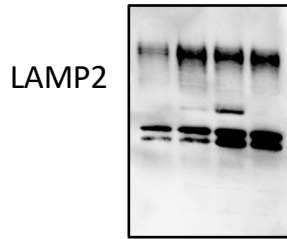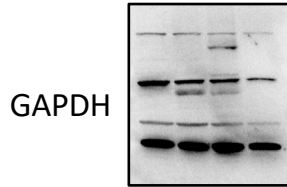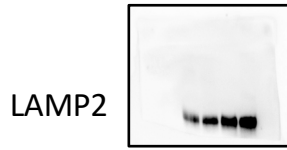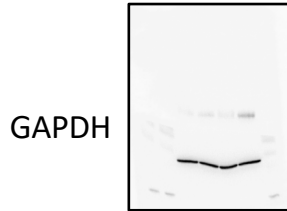

Supplement: EMBJ-39-e102030-s006.pdf [file EMBJ-39-e102030-s006.pdf]

**Figure 6F**

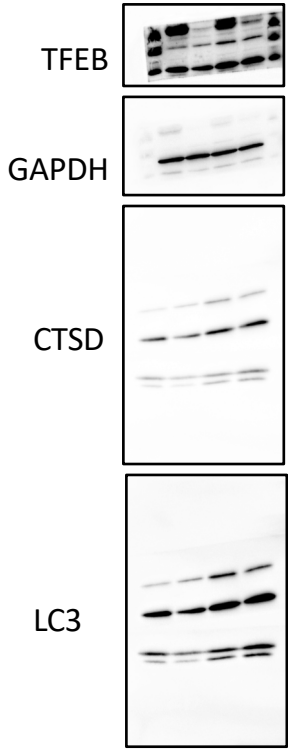

**Figure 6G**

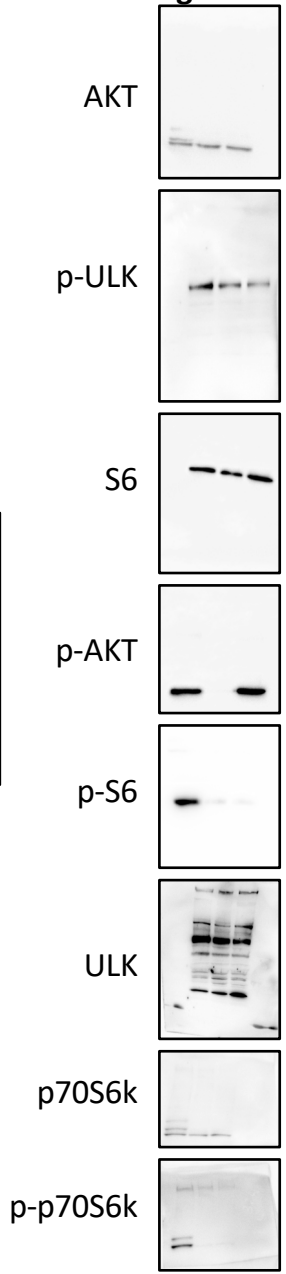

**Figure 6H**

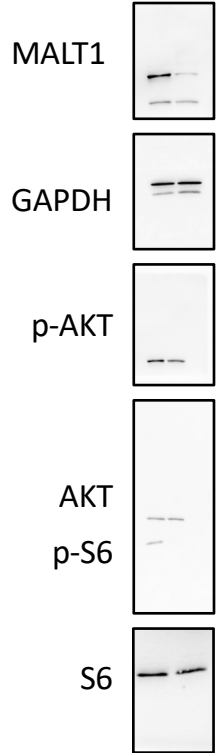

**Figure 6I**

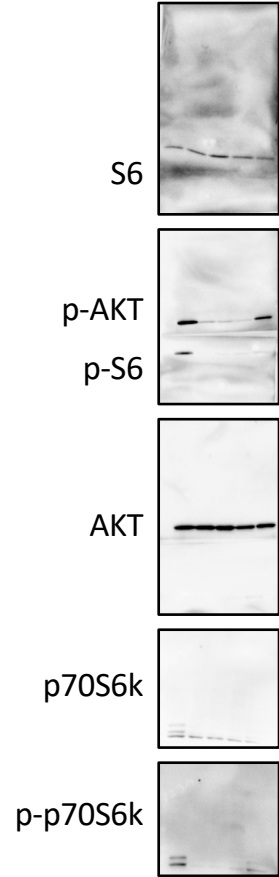

**Figure 6J**

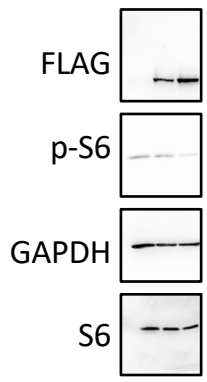

Supplement: EMBJ-39-e102030-s008.pdf [file EMBJ-39-e102030-s008.pdf]

**Figure 7B**

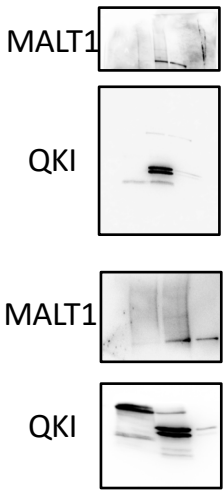

**Figure 7C**

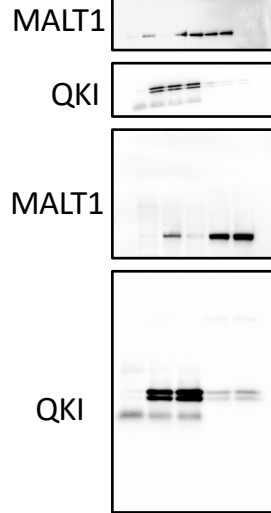

**Figure 7F**

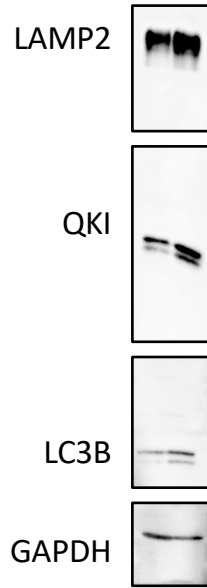

**Figure 7L**

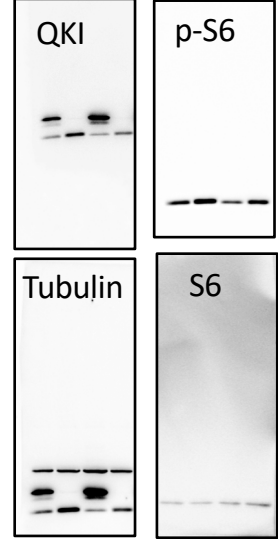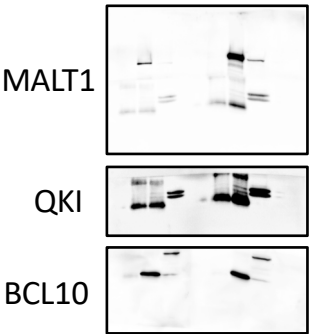

**Figure 7H**

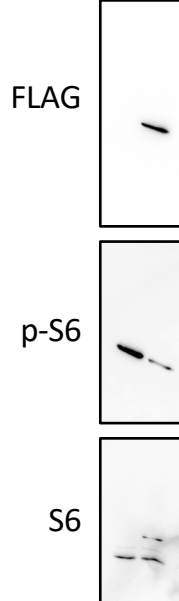

**Figure 7J**

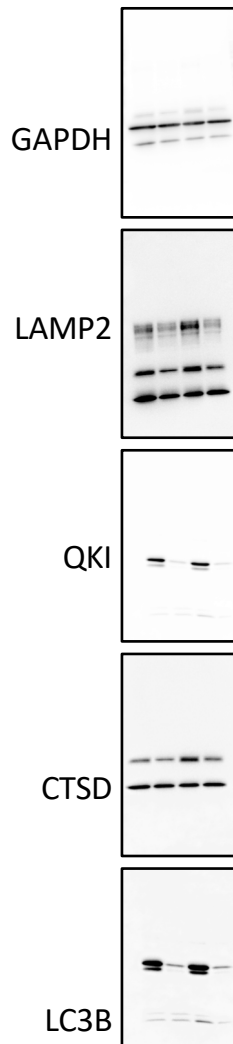

Supplement: EMBJ-39-e102030-s009.pdf [file EMBJ-39-e102030-s009.pdf]
